# Supplementary material for: An Insight into Synergistic Metal-Oxide Interaction in CO2 Hydrogenation to Methanol over Cu/ZnO/ZrO2
Source: MDPI journal article supplement (doi:10.3390/catal13101337), 2023-09-30
Supplement: s1 [file s1]

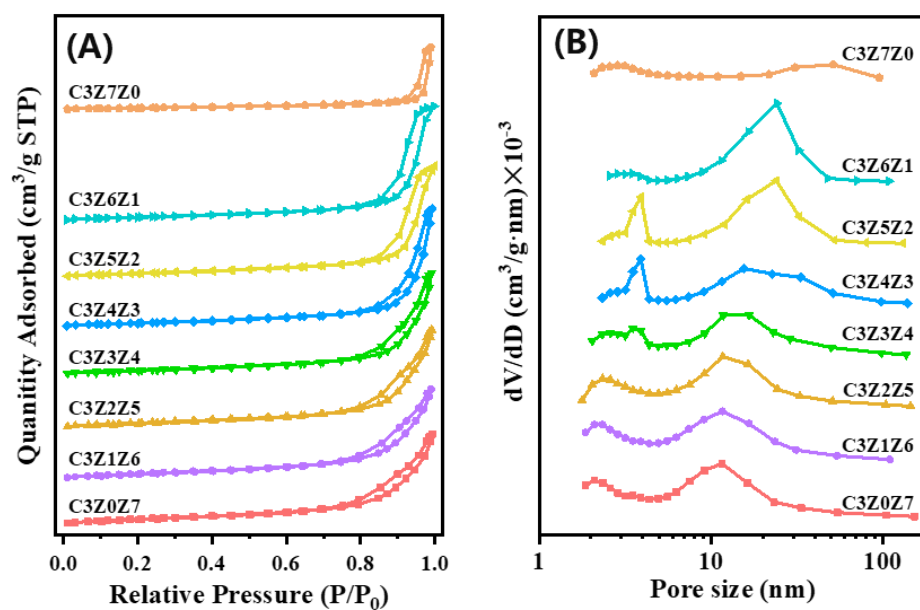

**Figure S1.**  $N_2$  adsorption-desorption isotherms (A) and pore size distributions (B).

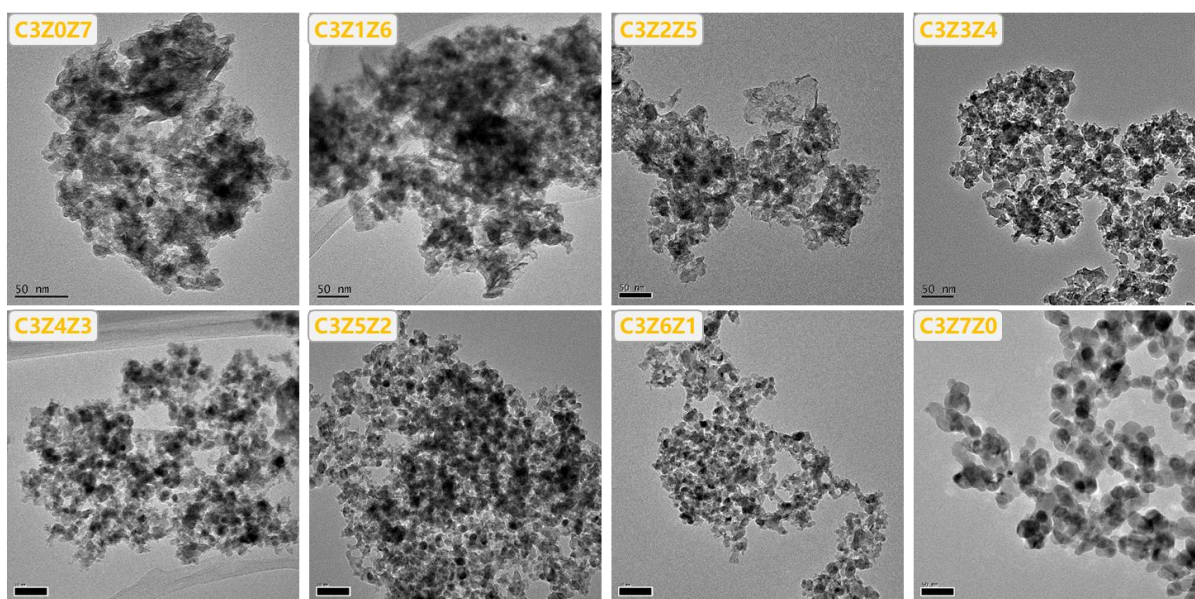

**Figure S2.** TEM images of reduced catalysts.

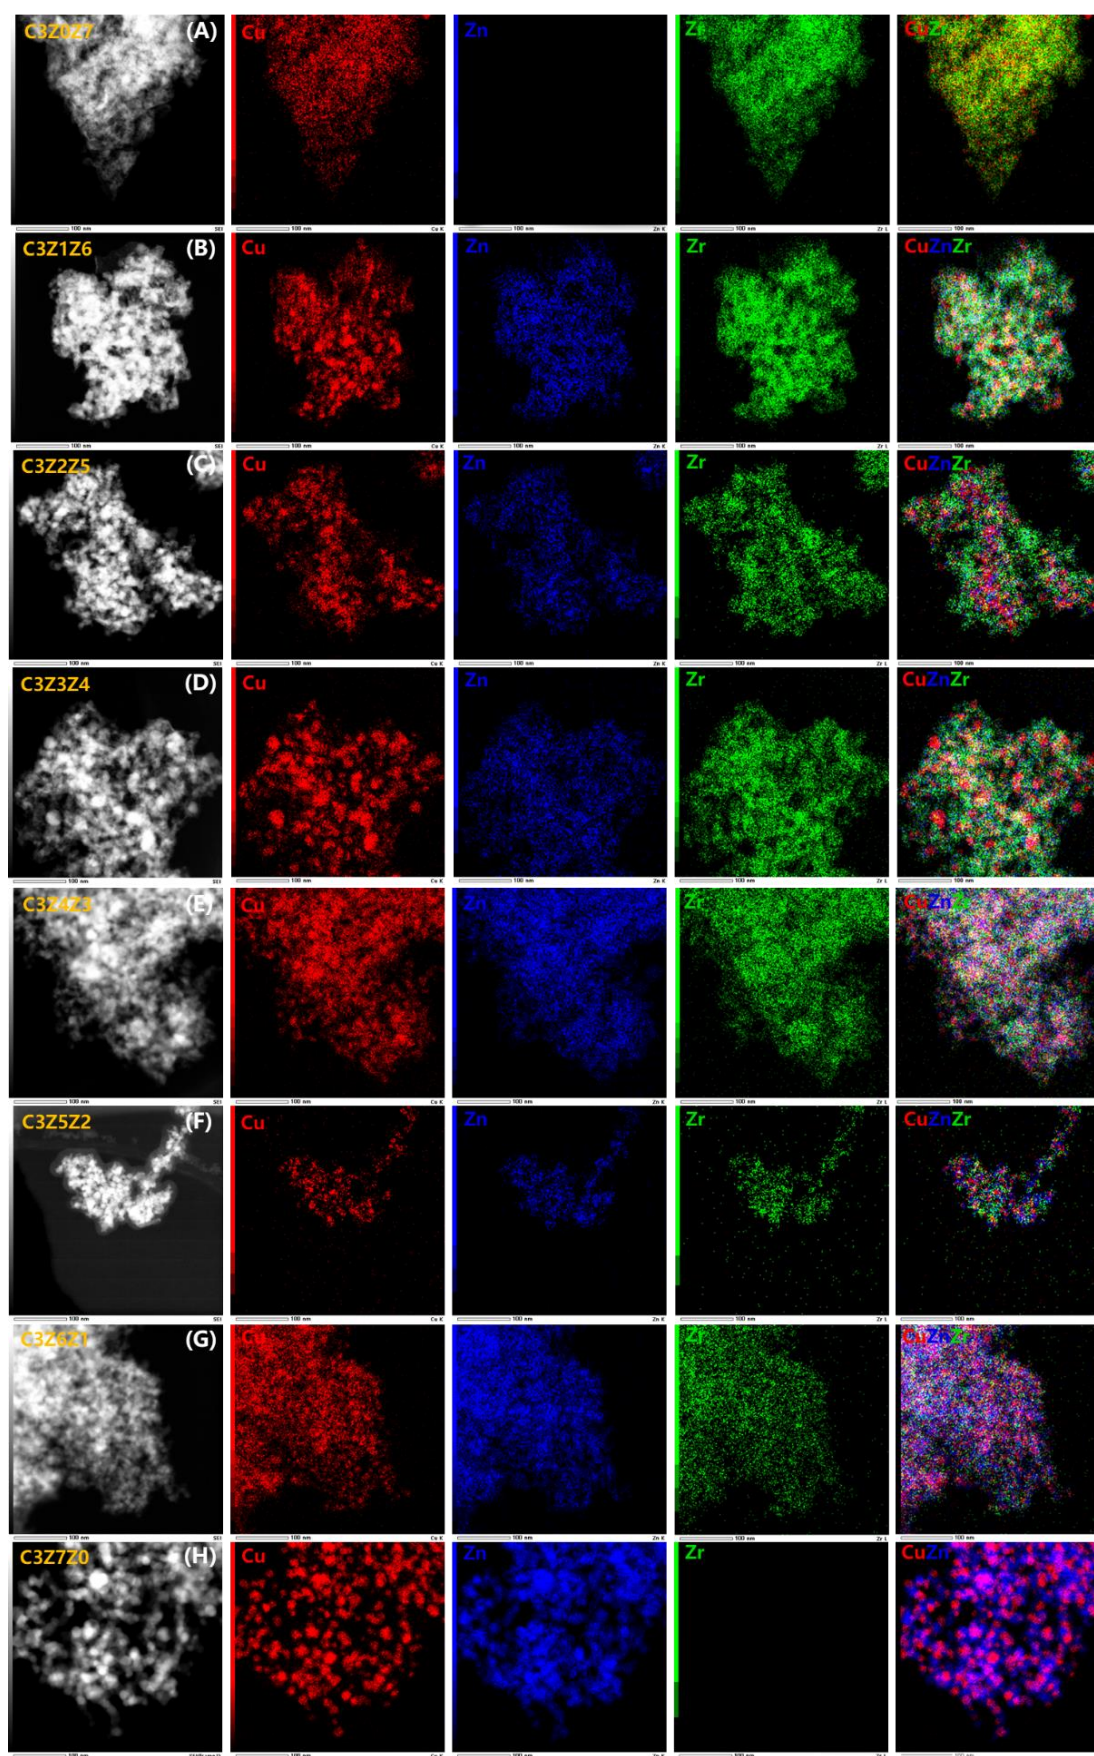

**Figure S3.** EDS-mapping images of reduced catalysts.



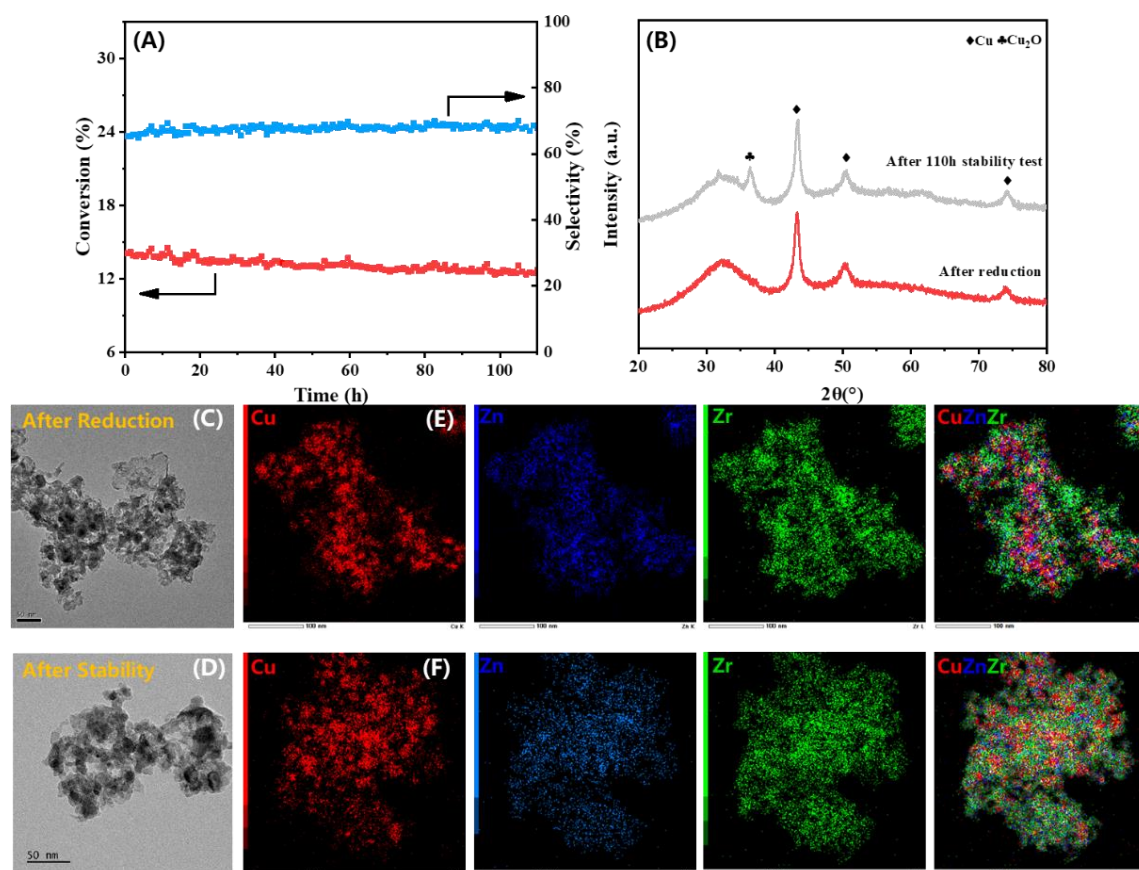

**Figure S4.** C3Z2Z5 (A) 110 h stability test, (B) XRD pattern after reduction and stability test, TEM image (C) after reduction and (D) stability test, EDS-mapping images (E) after reduction and (F) stability test.

**Table S1.** Catalytic performance of Cu-based catalysts for CO<sub>2</sub> hydrogenation to methanol

| Catalyst                                   | Reaction condition |                              | Catalytic performance                |                                |                                                      |
|--------------------------------------------|--------------------|------------------------------|--------------------------------------|--------------------------------|------------------------------------------------------|
|                                            | T (°C),<br>P (MPa) | WHSV/GHSV                    | CO <sub>2</sub><br>Conversion<br>(%) | Methanol<br>Selectivity<br>(%) | STY<br>(g <sub>methanol</sub> /kg <sub>cat</sub> /h) |
| This work                                  | 240, 3.0           | 18000 mL/g <sub>cat</sub> /h | 15.5                                 | 60.6                           | 610.8                                                |
| Cu-ZrO <sub>2</sub> [29]                   | 220, 3.0           | 9600 mL/g <sub>cat</sub> /h  | 6.7                                  | 69.6                           | 161.5                                                |
| Cu/a-ZrO <sub>2</sub> [39]                 | 240, 3.0           | -                            | 5.1                                  | 58.1                           | 81.3                                                 |
| CuZr <sub>0.9</sub> @SiO <sub>2</sub> [49] | 230, 2.5           | 12000 mL/g <sub>cat</sub> /h | -                                    | -                              | 23.3                                                 |
| Cu <sub>0.8</sub> ZrO <sub>2</sub> [50]    | 230, 2.5           | 12400 mL/g <sub>cat</sub> /h | <1                                   | 75                             | 12.4                                                 |
| FSP-<br>60Cu/ZrO <sub>2</sub> [51]         | 230, 1.0           | 6000 mL/g <sub>cat</sub> /h  | 2.9                                  | 59.5                           | 28.6                                                 |
| CZ-8-350[52]                               | 230, 1.0           | 8400 mL/g <sub>cat</sub> /h  | 2.1                                  | 71.5                           | 44.8                                                 |
| Cu <sub>40</sub> /ZrO <sub>2</sub> [53]    | 240, 5.0           | -                            | 6.6                                  | 68.0                           | -                                                    |
| CZ-450[54]                                 | 220, 3.0           | 3600 h <sup>-1</sup>         | 4.2                                  | 53.9                           | 45.7                                                 |
| 100CZZ[55]                                 | 240, 3.0           | 3600 h <sup>-1</sup>         | 5.8                                  | 68.1                           | -                                                    |
| CuO-ZnO-<br>ZrO <sub>2</sub> /SAPO-11[56]  | 275, 3.0           | -                            | 8.1                                  | 98                             | -                                                    |
| Cu <sub>32</sub> -ZnO-ZrO <sub>2</sub> [5] | 200, 1.0           | 8800 mL/g <sub>cat</sub> /h  | 2.2/1.2                              | 83.0/85.5                      | -                                                    |
| CuZnZr[57]                                 | 200, 3.0           | 19200 mL/g <sub>cat</sub> /h | 8.4                                  | 74                             | -                                                    |
| CZAZ-USP[58]                               | 230, 3.0           | 10000 mL/g <sub>cat</sub> /h | 22.5                                 | 22.6                           | -                                                    |
| CZAZ-5Al[59]                               | 250, 5.0           | 4000 mL/g <sub>cat</sub> /h  | 25.2                                 | 60.6                           | -                                                    |
